# Supplementary material for: Comparing doctors’ legal compliance across three Australian states for decisions whether to withhold or withdraw life-sustaining medical treatment: does different law lead to different decisions?
Source: Springer Nature journal article supplement (doi:10.1186/s12904-017-0249-1), 2017-11-28
Supplement: MOESM1 [file 15262208]

**Comparing doctors' legal compliance across three Australian states for decisions whether to withhold or withdraw life-sustaining medical treatment: does different law lead to different decisions?**

**Additional file 1**

Professor Ben P White (Corresponding author)  
Director, Australian Centre for Health Law Research, Faculty of Law,  
Queensland University of Technology, Brisbane, Australia  
[bp.white@qut.edu.au](mailto:bp.white@qut.edu.au)  
[Ph: \(+61\) 7 3138 4066](tel:+61731384066)

Professor Lindy Willmott  
Director, Australian Centre for Health Law Research, Faculty of Law,  
Queensland University of Technology, Brisbane, Australia  
[l.willmott@qut.edu.au](mailto:l.willmott@qut.edu.au)

Emeritus Professor Colleen Cartwright  
Southern Cross University, Gold Coast, Australia  
[colleen.cartwright@scu.edu.au](mailto:colleen.cartwright@scu.edu.au)

Emeritus Professor Malcolm Parker  
Faculty of Medicine,  
University of Queensland, Brisbane, Australia,  
[m.parker@uq.edu.au](mailto:m.parker@uq.edu.au)

Professor Gail Williams  
School of Public Health,  
University of Queensland, Brisbane, Australia  
[g.williams@sph.uq.edu.au](mailto:g.williams@sph.uq.edu.au)

Juliet Davis  
Australian Centre for Health Law Research, Faculty of Law,  
Queensland University of Technology, Brisbane, Australia  
[jed2169@columbia.edu](mailto:jed2169@columbia.edu)

## Comparison of AMPCo database and study sample

AMPCo provided marginal distributions by gender, age and main specialty for each state, based on the information in the AMPCo database for the selected specialties. The numbers of questionnaires sent to each specialty group were also recorded. We could not calculate exact response rates by each characteristic as responses could not be linked to the individual doctors selected. It is also possible that variable values differed in the AMPCo records and study questionnaire responses. Table S1 shows the marginal distributions of state, gender, age and specialty for the original sample from the AMPCo database and the study responses.

### Comparison of AMPCo database and study sample by state, gender, age and main specialty

| Characteristic          |         | Total Surveyed             | Total Responses           |
|-------------------------|---------|----------------------------|---------------------------|
|                         |         | N = 2858<br>n (%)<br>AMPCo | N = 867<br>n (%)<br>Study |
| <b>State and Gender</b> |         |                            |                           |
| Queensland              | Males   | 461 (72)                   | 148 (68)                  |
|                         | Females | 175 (28)                   | 69 (32)                   |
| NSW                     | Males   | 814 (66)                   | 221 (66)                  |
|                         | Females | 420 (34)                   | 114 (34)                  |
| Victoria                | Males   | 655 (66)                   | 198 (63)                  |
|                         | Females | 333 (34)                   | 115 (37)                  |
| Missing gender          |         | 0                          | 2                         |
| <b>Age</b>              |         |                            |                           |
| Less than 40 years      |         | 827 (29)                   | 177 (20)                  |
| 40 to 49 years          |         | 1047 (37)                  | 336 (39)                  |
| 50 to 59 years          |         | 568 (20)                   | 219 (25)                  |
| 60 years or older       |         | 266 ( 9)                   | 117 (13)                  |
| Missing age             |         | 150 ( 5)                   | 18 ( 2)                   |
| <b>Main Specialty</b>   |         |                            |                           |
| Emergency Medicine      |         | 1147 (40)                  | 270 (31)                  |
| Geriatric Medicine      |         | 253 ( 9)                   | 107 (12)                  |
| Intensive Care          |         | 428 (15)                   | 125 (14)                  |
| Medical Oncology        |         | 338 (12)                   | 80 ( 9)                   |
| Palliative Care         |         | 105 ( 4)                   | 52 ( 6)                   |
| Renal Medicine          |         | 253 ( 9)                   | 80 ( 9)                   |
| Respiratory Medicine    |         | 334 (12)                   | 98 (11)                   |
| Missing specialty       |         | 0                          | 55 ( 6)                   |
