# Supplementary material for: Comparing doctors’ legal compliance across three Australian states for decisions whether to withhold or withdraw life-sustaining medical treatment: does different law lead to different decisions?
Source: Springer Nature journal article supplement (doi:10.1186/s12904-017-0249-1), 2017-11-28
Supplement: MOESM2 [file 15262208]

**Comparing doctors' legal compliance across three Australian states for decisions whether to withhold or withdraw life-sustaining medical treatment: does different law lead to different decisions?**

**Additional file 2**

Professor Ben P White (Corresponding author)  
Director, Australian Centre for Health Law Research, Faculty of Law,  
Queensland University of Technology, Brisbane, Australia  
[bp.white@qut.edu.au](mailto:bp.white@qut.edu.au)  
[Ph: \(+61\) 7 3138 4066](tel:+61731384066)

Professor Lindy Willmott  
Director, Australian Centre for Health Law Research, Faculty of Law,  
Queensland University of Technology, Brisbane, Australia  
[l.willmott@qut.edu.au](mailto:l.willmott@qut.edu.au)

Emeritus Professor Colleen Cartwright  
Southern Cross University, Gold Coast, Australia  
[colleen.cartwright@scu.edu.au](mailto:colleen.cartwright@scu.edu.au)

Emeritus Professor Malcolm Parker  
Faculty of Medicine,  
University of Queensland, Brisbane, Australia,  
[m.parker@uq.edu.au](mailto:m.parker@uq.edu.au)

Professor Gail Williams  
School of Public Health,  
University of Queensland, Brisbane, Australia  
[g.williams@sph.uq.edu.au](mailto:g.williams@sph.uq.edu.au)

Juliet Davis  
Australian Centre for Health Law Research, Faculty of Law,  
Queensland University of Technology, Brisbane, Australia  
[jed2169@columbia.edu](mailto:jed2169@columbia.edu)

## **Explanation of Law: What does the Law Say? Responses by State**

**NSW** – The law says: do not commence antibiotics. This is because Mark has a valid advance care directive that applies to the situation that has arisen.

**Victoria** – The law says: do not commence antibiotics. Mark has a valid refusal of treatment certificate and his refusal of antibiotics is for a ‘current condition’ (his AIDS) that he had when completing this document. The position is not as certain as in NSW, however, due to the need to be refusing treatment for a current condition (which would have to be the AIDS rather than pneumonia).

**Queensland** – The law says: commence antibiotics. The conditions required for the advance health directive to apply under Queensland law (namely having a sufficiently serious medical condition and not having a reasonable prospect of regaining decision-making capacity) have not been met and the substitute decision-maker desires treatment.

Note: The law in these three jurisdictions is discussed in more detail in the below papers.

White B, Willmott L, Trowse P, et al. The legal role of medical professionals in decisions to withhold or withdraw life-sustaining treatment: part 1 (New South Wales). *J Law Med* 2011; 18: 498-522.

Willmott L, White B, Parker M, et al. The legal role of medical professionals in decisions to withhold or withdraw life-sustaining treatment: part 2 (Queensland). *J Law Med* 2011; 18: 523-544.

Willmott L, White, B, Parker M, et al. The legal role of medical professionals in decisions to withhold or withdraw life-sustaining treatment: part 3 (Victoria). *J Law Med* 2011; 18: 773-797.
